# Supplementary material for: To Invest or Not to Invest, That Is the Question: Analysis of Firm Behavior under Anticipated Shocks
Source: PLOS journal article supplement (doi:10.1371/journal.pone.0158782), 2016-08-10
Supplement: S1 (10.1371/journal.pone.0158782.s001) [file journal.pone.0158782.s001]

## Supporting Information

### To Invest or Not to Invest, That is the Question: Analysis of Firm Behavior Under Anticipated Shocks

Dejan Kovac<sup>1-4</sup>, Vuk Vukovic<sup>2-4\*</sup>, Nikola Kleut<sup>4-5</sup>, Boris Podobnik<sup>2-4,6-7</sup>

**1** CERGE-EI, A joint workplace of the Center for Economic Research and Graduate Education, Charles University, Prague, and the Economics Institute of the Academy of Sciences of the Czech Republic, Prague, Czech Republic

**2** Luxembourg School of Business, Luxembourg, Grand-Duchy of Luxembourg

**3** Department of Economics, Zagreb School of Economics and Management, Zagreb, Croatia.

**4** Adriatic Economic Association, Zagreb, Croatia

**5** Zenlab d.o.o., Zagreb, Croatia

**6** Faculty of Economics, University of Ljubljana, Ljubljana, Slovenia.

**7** Faculty of Civil Engineering, University of Rijeka, Rijeka, Croatia.

\* Corresponding author: vuk.vukovic@zsem.hr

## Appendix

**Table S1.** Between-industry transition probability matrix (part 1)

|               | Agriculture | Mining | Manufacturing | Electricity | Water supply | Construction | Retail | Transport | Food  | ICT   |
|---------------|-------------|--------|---------------|-------------|--------------|--------------|--------|-----------|-------|-------|
| Agriculture   | 91.23       | 0.06   | 3.20          | 0.06        | 0.06         | 0.32         | 1.98   | 0.32      | 0.38  | 0.06  |
| Mining        | 0.00        | 92.00  | 3.43          | 0.00        | 0.00         | 0.57         | 1.14   | 0.57      | 0.57  | 0.00  |
| Manufacturing | 0.19        | 0.09   | 95.19         | 0.03        | 0.03         | 0.57         | 1.85   | 0.16      | 0.33  | 0.38  |
| Electricity   | 0.00        | 0.00   | 3.36          | 93.28       | 1.68         | 0.00         | 0.00   | 0.84      | 0.00  | 0.00  |
| Water supply  | 0.00        | 0.00   | 0.25          | 0.00        | 96.72        | 0.51         | 0.76   | 0.25      | 0.00  | 0.00  |
| Construction  | 0.05        | 0.00   | 0.85          | 0.04        | 0.10         | 95.43        | 0.94   | 0.20      | 0.36  | 0.19  |
| Retail        | 0.21        | 0.01   | 2.08          | 0.04        | 0.10         | 0.78         | 93.68  | 0.34      | 0.50  | 0.38  |
| Transport     | 0.12        | 0.04   | 1.02          | 0.04        | 0.04         | 0.79         | 4.40   | 91.44     | 0.47  | 0.20  |
| Food          | 0.19        | 0.00   | 0.82          | 0.03        | 0.03         | 0.32         | 1.80   | 0.28      | 94.18 | 0.09  |
| ICT           | 0.00        | 0.00   | 1.35          | 0.04        | 0.00         | 0.32         | 1.03   | 0.28      | 0.20  | 94.38 |
